# Supplementary material for: A 1-phytase type III effector interferes with plant hormone signaling
Source: Springer Nature journal article supplement (doi:10.1038/s41467-017-02195-8), 2017-12-12
Supplement: MOESM1 [file 41467_2017_2195_MOESM1_ESM.pdf]

## SUPPLEMENTARY INFORMATION

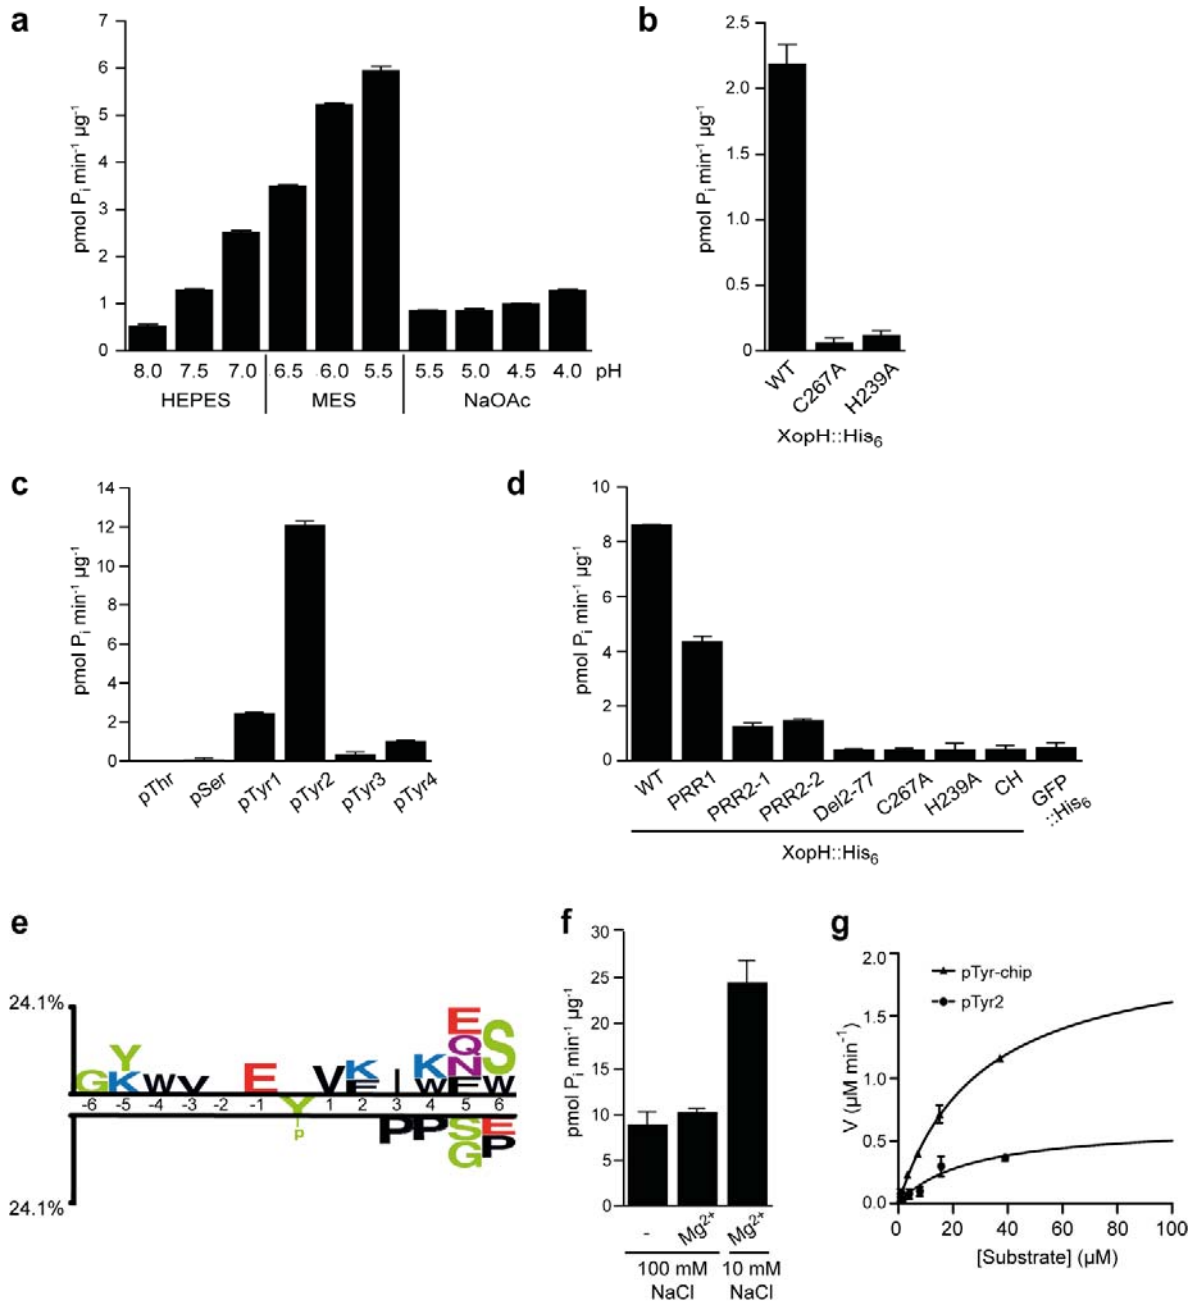

### Supplementary Figure 1: Characterization of the XopH protein phosphatase activity.

**a**, Dephosphorylation of pNPP by XopH in different buffering systems. **b**, Dephosphorylation of pNPP by XopH (WT) and catalytic variants in 50 mM HEPES pH 7.0. **c**, Dephosphorylation of 0.5 mM commercial phosphor-peptides by XopH. pThr, PRApTVA; pSer, PRApSV; pTyr1,

ENDpYINASL; pTyr2, DADEpYLIPQQP; pTyr3, RRLIEDAepYAARG; pTyr4, TSTEPQpYQPGENL. **d**, pTyr dephosphorylation by XopH (WT) and mutant derivatives. GFP served as negative control. **e**, Two-sample logo of pTyr dephosphorylation by XopH displaying enriched and depleted amino acid residues surrounding the dephosphorylated tyrosine. The logo was created from 72 top substrates out of >6000 peptides tested. **f**, pTyr2 dephosphorylation by XopH under high and low salt conditions. **g**, Kinetics of pTyr2 and pTyr-chip (KVDVDEpYDENKFVW) dephosphorylation by XopH. The maximal velocity  $V_{\max}$  and Michaelis constant  $K_M$  were  $0.63 \pm 0.16 \mu\text{M min}^{-1}$  and  $25.7 \pm 12.2 \mu\text{M}$  for pTyr2 (circles),  $0.21 \pm 0.12 \mu\text{M min}^{-1}$  and  $29.7 \pm 3.0 \mu\text{M}$  for pTyr-chip (triangles). The experiments in a-d, f and g were performed twice with similar results, using two independent protein preparations each. Values are means of two technical replicates. Error bars indicate s.d.

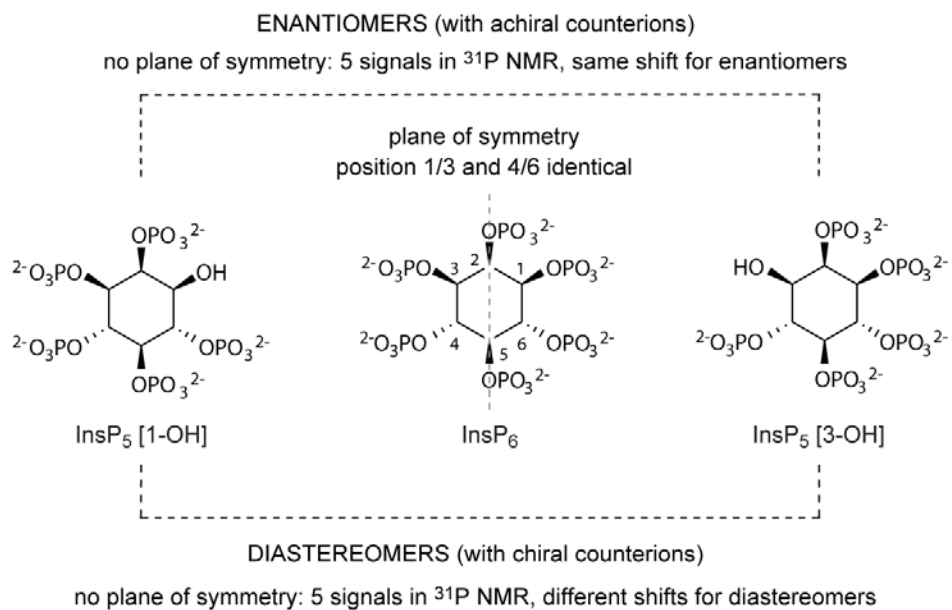

**Supplementary Figure 2: Structures and symmetry of InsP<sub>6</sub> and dephosphorylated derivatives.**

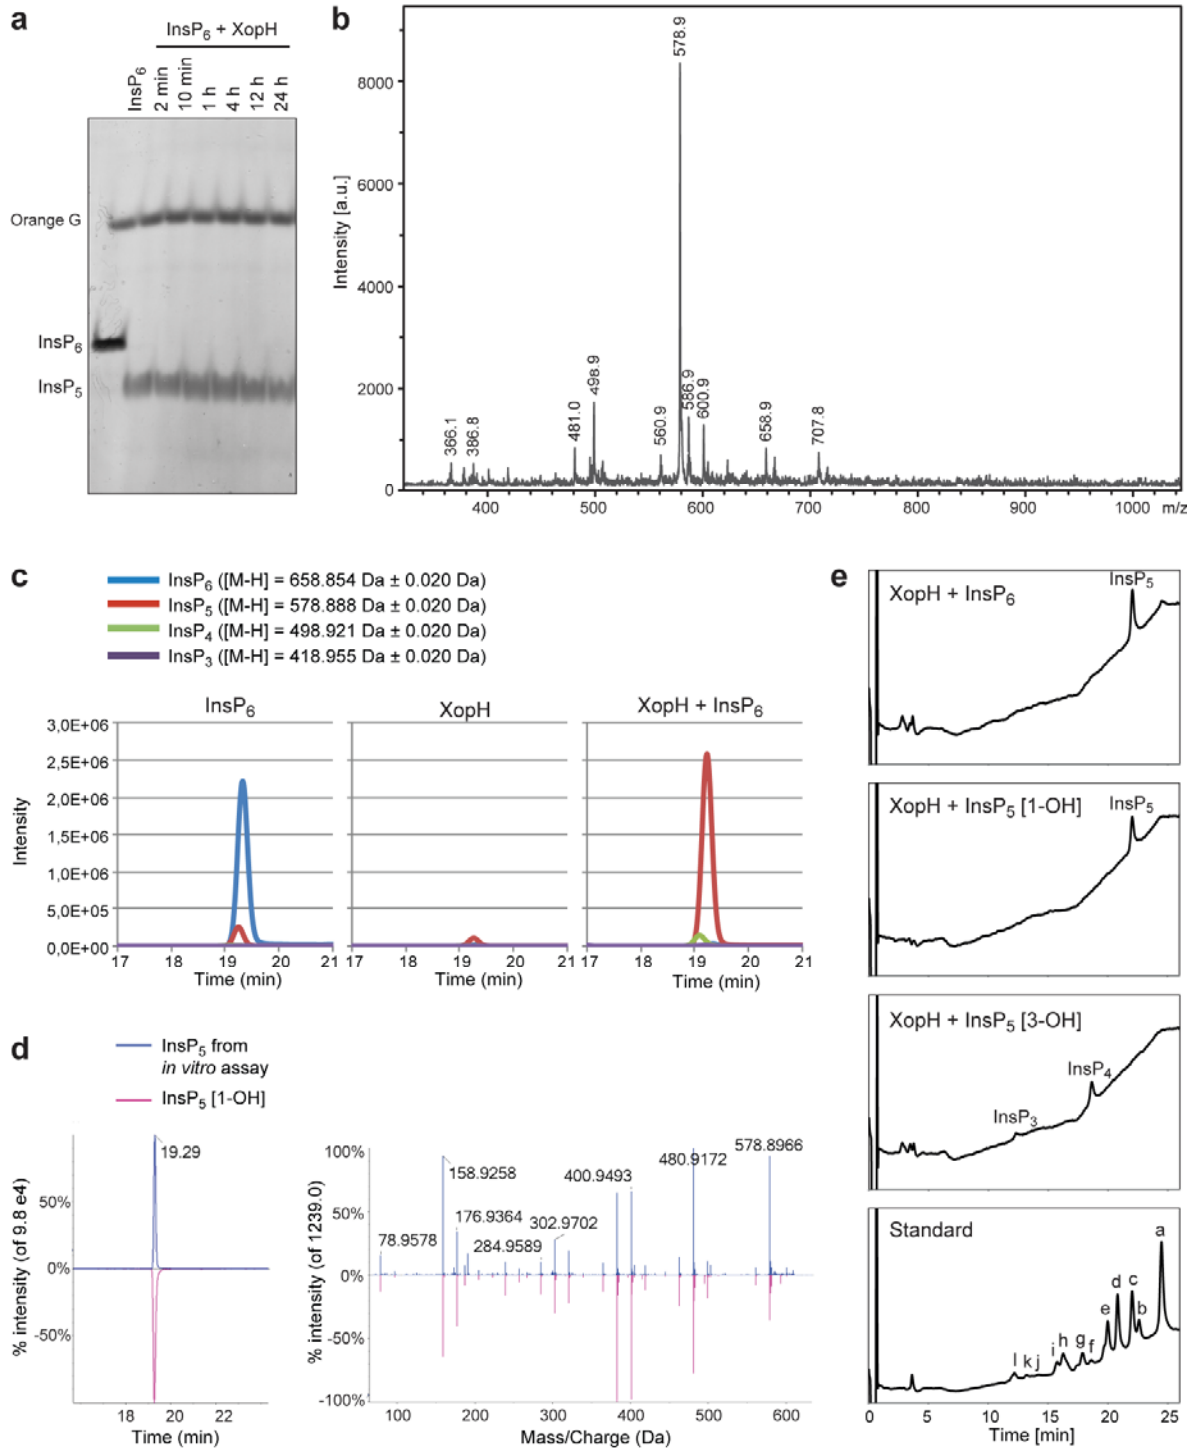

**Supplementary Figure 3: InsP<sub>5</sub> is the main product of XopH-dependent InsP<sub>6</sub> dephosphorylation.**

**a**, InsP<sub>6</sub> was incubated with XopH for various time points as indicated. Reaction products were separated by PAGE and visualized by toluidine blue. Undigested InsP<sub>6</sub> served as control. Orange

G, loading dye. The experiment was repeated once with similar results. **b**, MALDI-ToF-MS of gel-purified hydrolysis product of InsP<sub>6</sub> after treatment with recombinant XopH enzyme. The obtained ion mass (578.9) corresponds to an InsP<sub>5</sub>. **c**, LC-ToF-MS analysis of *myo*-inositolpolyphosphates in recombinant XopH enzyme assays. Expected retention times: InsP<sub>6</sub>: 19.33 min, InsP<sub>5</sub>: 19.26 min (all isomers coelute in one peak), InsP<sub>4</sub>: 19.08 min (all isomers coelute in one peak), InsP<sub>3</sub>: 17.5-18.2 min (dependent on isomer). The experiment was repeated twice with similar results. **d**, LC-QToF-MS/MS analysis of InsP<sub>5</sub> [1-OH]. Left panel: chromatographic retention of InsP<sub>5</sub> monoisotopic precursor ion mass ([M-H] = 578.888 Da ± 0.02 Da), right panel: MS/MS spectra of InsP<sub>5</sub> from recombinant XopH enzyme assays and InsP<sub>5</sub> [1-OH] standard. **e**, High-performance ion chromatography (HPIC) analysis of XopH-dependent hydrolysis products of InsP<sub>6</sub>, InsP<sub>5</sub> [1-OH] and InsP<sub>5</sub> [3-OH]. An InsP<sub>x</sub> mix served as standard: a, InsP<sub>6</sub>; b, Ins(1,3,4,5,6)P<sub>5</sub>; c, Ins(1,2,4,5,6)P<sub>5</sub>; d, Ins(1,2,3,4,5)P<sub>5</sub>; e, Ins(1,2,3,4,6)P<sub>5</sub>; f, Ins(1,2,5,6)P<sub>4</sub>; g, Ins(1,3,4,5)P<sub>4</sub>; h, Ins(1,2,4,5)P<sub>4</sub>; i, Ins(1,2,3,4)P<sub>4</sub>/Ins(1,3,4,6)P<sub>4</sub>; j, Ins(1,2,3,5)P<sub>4</sub>/Ins(1,2,4,6)P<sub>4</sub>; k, Ins(4,5,6)P<sub>3</sub>; l, Ins(1,5,6)P<sub>3</sub>.

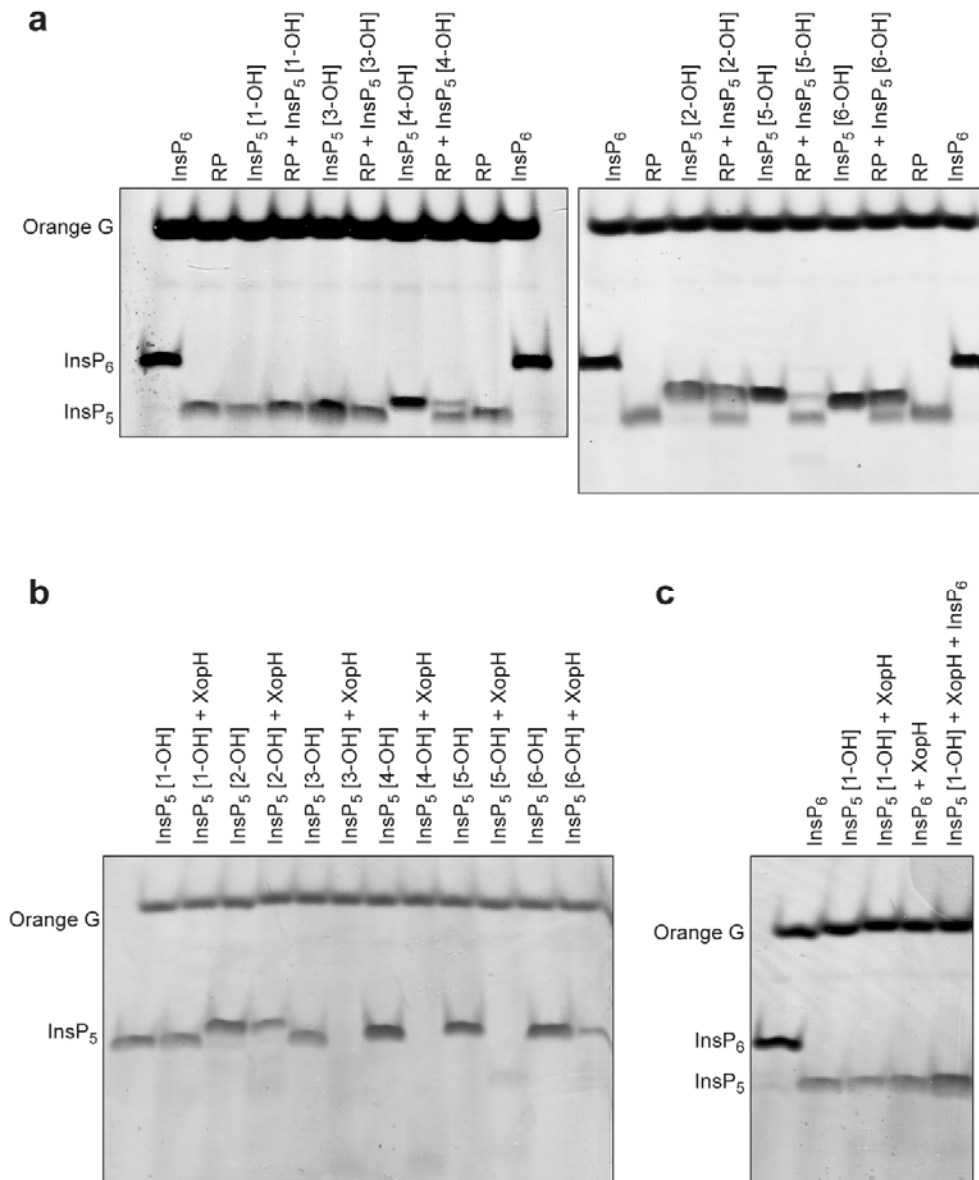

**Supplementary Figure 4: InsP<sub>5</sub> [1-OH] is the likely XopH-dependent InsP<sub>6</sub> dephosphorylation product.**

**a**, Reaction products (RP) obtained by phytate digestion with XopH (0.13 $\mu$ g/ $\mu$ L; 30 min) were mixed with InsP<sub>5</sub> isomers as indicated, separated by PAGE and visualized by toluidine blue staining. InsP<sub>6</sub> and InsP<sub>5</sub> isomers alone served as controls. Double bands report different isomer identities of RP and the respective InsP<sub>5</sub> species tested. **b**, All six different InsP<sub>5</sub> isomers (10 nmol) were digested with XopH, separated by PAGE and visualized by toluidine blue staining. **c**, An InsP<sub>5</sub> [1-OH]/XopH reaction mixture was incubated for 30 min at 28°C, then supplemented with InsP<sub>6</sub> (10 nmol) for additional 30 min, separated by PAGE and visualized by toluidine blue staining. InsP<sub>6</sub>, InsP<sub>5</sub> [1-OH] and the InsP<sub>5</sub> [1-OH]/XopH reaction mixture (incubated for 1 h at

28°C prior to loading onto the gel) served as controls. The experiments were done twice with similar results.

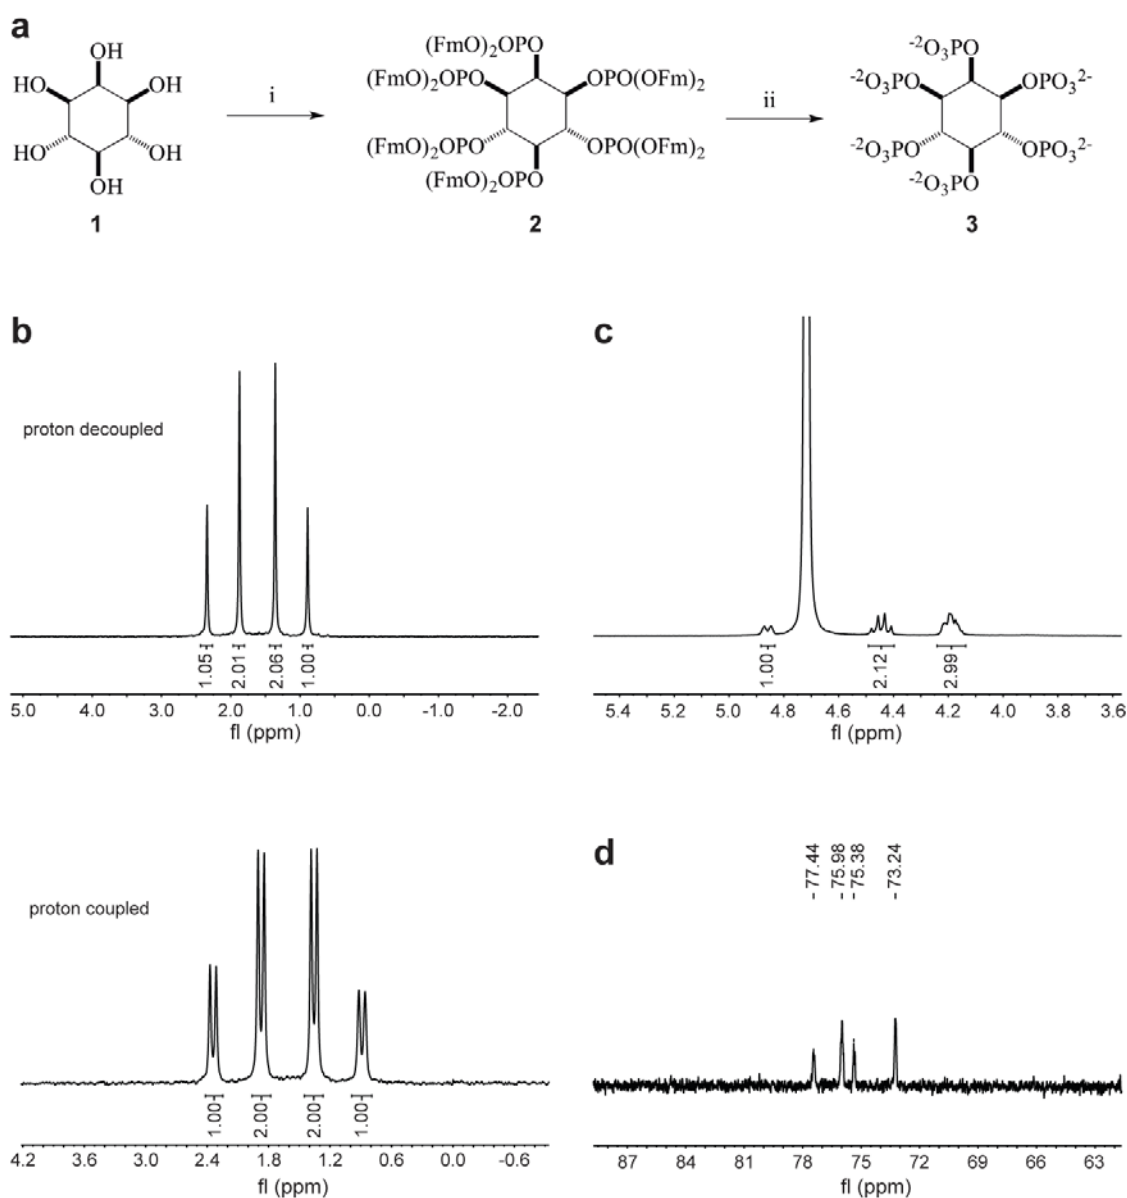

**Supplementary Figure 5: InsP<sub>6</sub> synthesis and quality control.**

**a**, Chemical synthesis of highly pure InsP<sub>6</sub>: (i) Bis-fluorenylmethyl-diisopropylamino-P-amidite (CAS: 197709-11-8), 4,5-Dicyanoimidazole, then *m*CPBA, 32 % yield; (ii) 5% Piperidine in DMF, then precipitation (and ion exchange with NaI), 92% yield. **b-d**, Quality control of synthetic InsP<sub>6</sub>. **b**, InsP<sub>6</sub>, <sup>31</sup>P-NMR in D<sub>2</sub>O. **c**, InsP<sub>6</sub>, <sup>1</sup>H-NMR in D<sub>2</sub>O. **d**, InsP<sub>6</sub>, <sup>13</sup>C NMR in D<sub>2</sub>O.



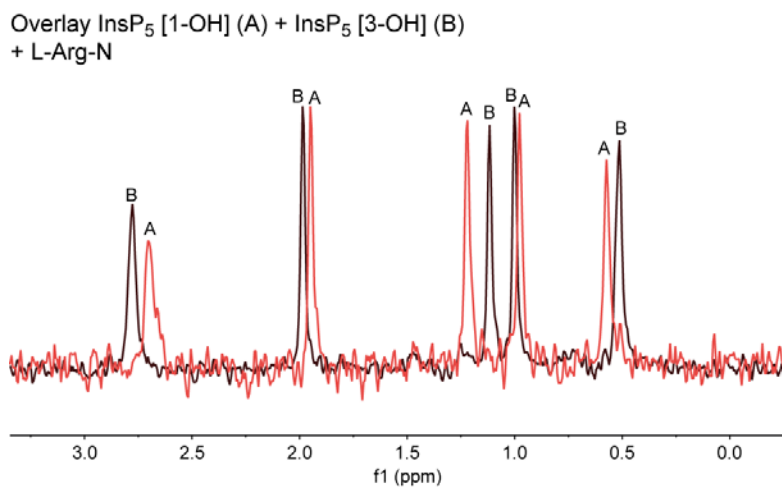

**Supplementary Figure 6: L-Arg-N enables the discrimination of InsP<sub>5</sub> [1/3-OH] by <sup>31</sup>P-NMR.**

Overlay of separately recorded mixtures of either InsP<sub>5</sub> [1-OH] (A) or InsP<sub>5</sub> [3-OH] (B), 100 μg each, in ammonium acetate buffer in the presence of excess of L-Arg-N (ca. 100 fold). The relative position of the peaks is identical to those found in spiking experiments.

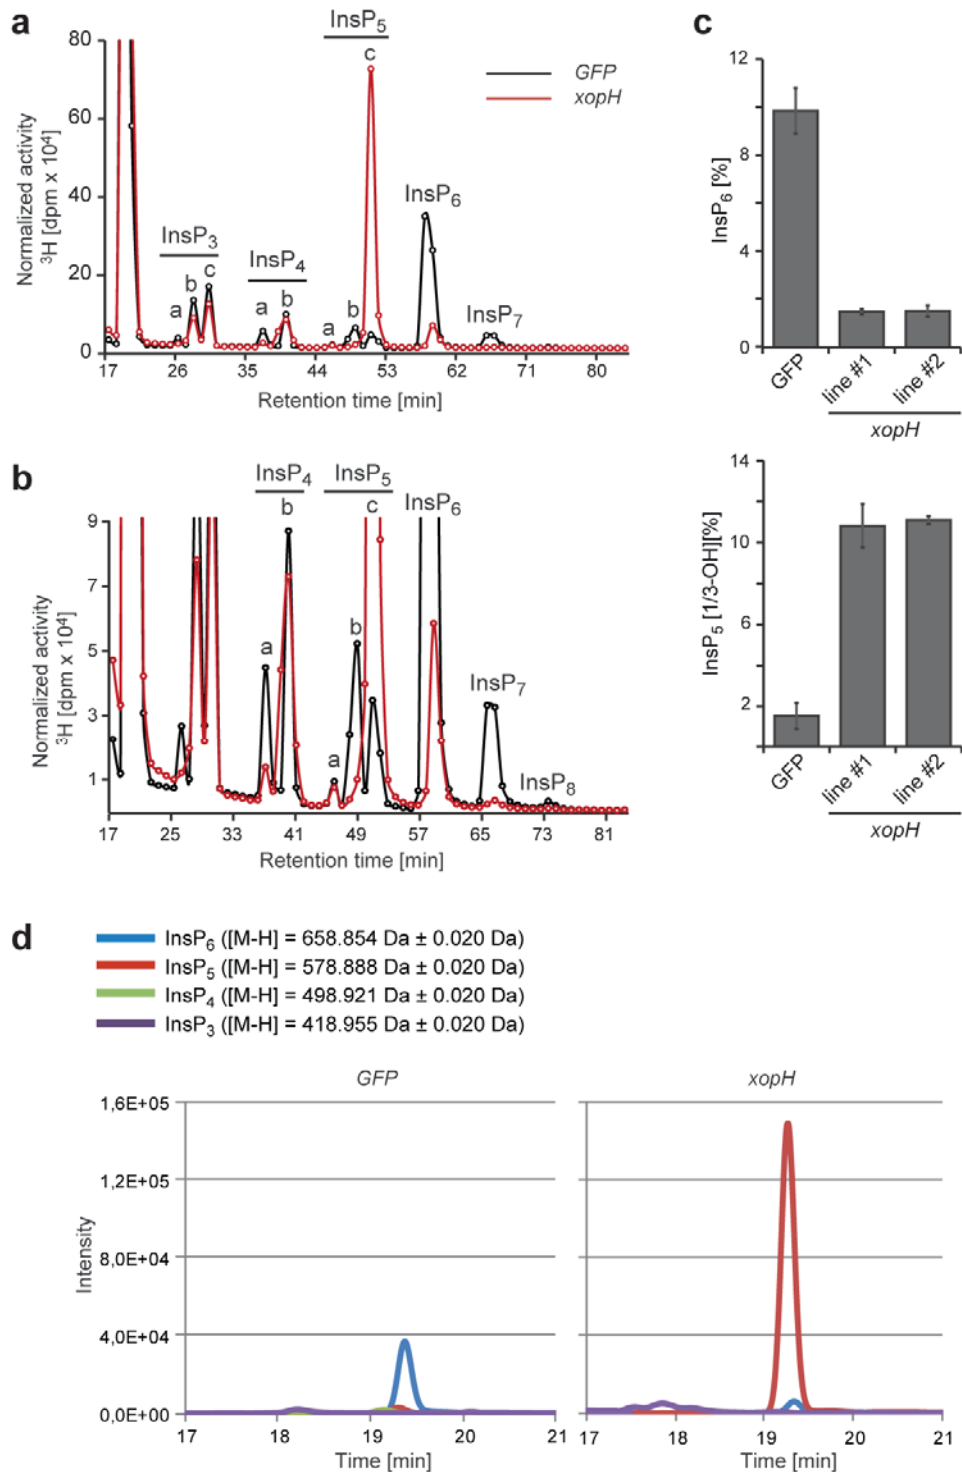

**Supplementary Figure 7: XopH leads to InsP<sub>5</sub> accumulation *in planta*.**

**a**, HPLC profiles of neutralized extracts from 16-day old *N. benthamiana* transgenic seedlings labelled with [ $^3\text{H}$ ]-*myo*-inositol. Based on published chromatographic mobilities<sup>1</sup>, InsP<sub>5a</sub> represents InsP<sub>5</sub> [2-OH] and InsP<sub>5c</sub> represents InsP<sub>5</sub> [1-OH] or its enantiomer InsP<sub>5</sub> [3-OH]. The

isomeric nature of InsP<sub>3a-c</sub>, InsP<sub>4a-b</sub>, InsP<sub>7</sub> and InsP<sub>8</sub> is unknown. **b**, Zoom-in into the HPLC profile. **c**, Relative amounts of InsP<sub>5c</sub> and InsP<sub>6</sub> in control line expressing *gfp* and two independent *xopH*-expressing lines. Error bars indicate s.e.m. **d**, LC-ToF-MS analysis of *myo*-inositolpolyphosphates in transgenic *N. benthamiana* seedlings. Plant extracts were generated as in **a**, but with unlabeled *myo*-inositol. Expected retention times: InsP<sub>6</sub>: 19.33 min, InsP<sub>5</sub>: 19.26 min (all isomers coelute in one peak), InsP<sub>4</sub>: 19.08 min (all isomers coelute in one peak), InsP<sub>3</sub>: 17.5-18.2 min (isomer-dependent). The experiments were performed three times with similar results.

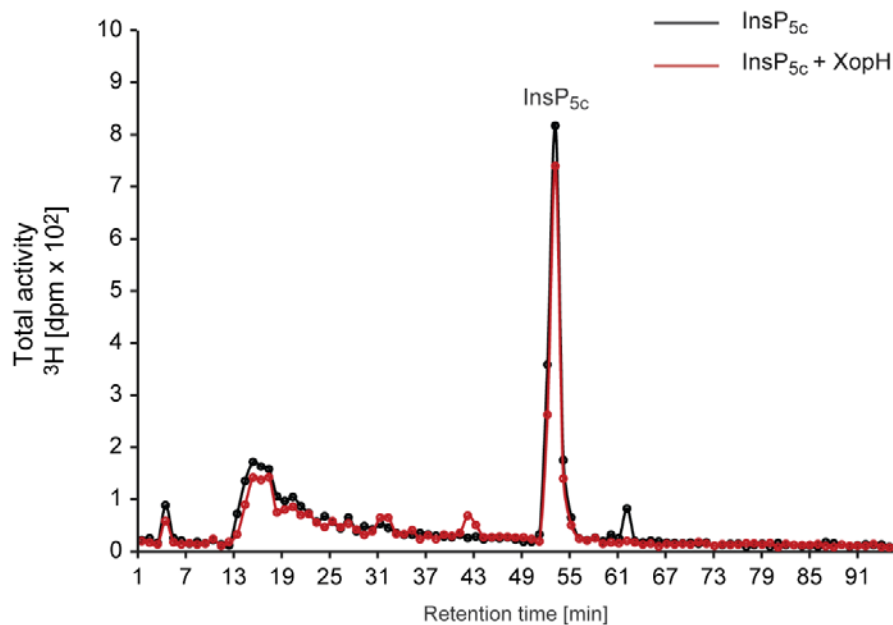

**Supplementary Figure 8: The enantiomer identity of XopH-dependent  $\text{InsP}_6$  hydrolysis *in planta* is  $\text{InsP}_5$  [1-OH].**

Digestion and HPLC analyses of plant-purified  $\text{InsP}_{5c}$ .  $\text{InsP}_{5c}$  was purified from [ $^3\text{H}$ ]-*myo*-inositol-labeled *xopH*- and *GFP*-expressing *N. benthamiana* seedlings (see methods). XopH-treated or non-treated  $\text{InsP}_{5c}$  was then separated by SAX-HPLC. XopH was inactivated by incubating the reaction mixture at 95°C for 15 min. The figure shows the full chromatograms of the respective selections (min 45-71) depicted in Figure 7.

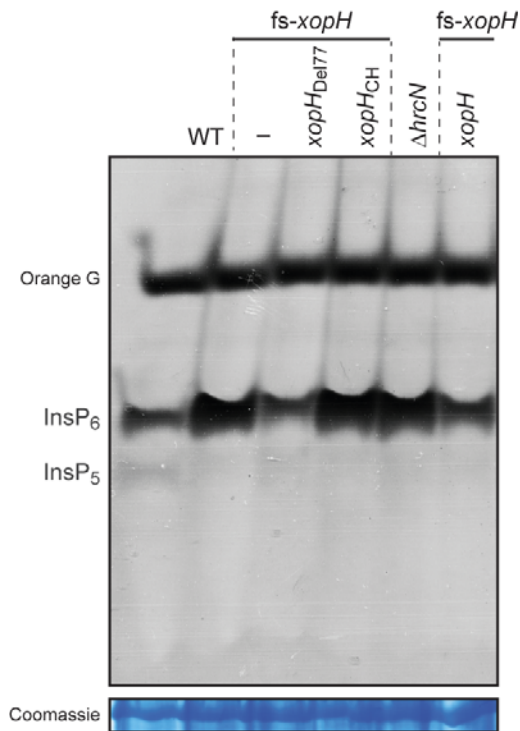

**Supplementary Figure 9: XopH reduces the InsP<sub>6</sub> content of pepper leaves during *Xcv* infection.**

HClO<sub>4</sub> extracts of *C. annuum* ECW leaves infected with *Xcv* strains as indicated were subjected to TiO<sub>2</sub> bead enrichment. Inositol polyphosphates were eluted from TiO<sub>2</sub> beads, resolved by PAGE and stained with toluidine blue. Protein extracts were visualized by Coomassie blue as a loading control. The experiment was repeated twice with similar results.

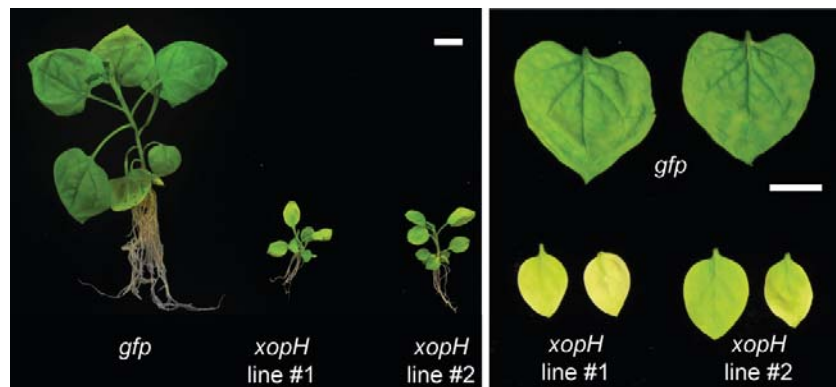

**Supplementary Figure 10: XopH affects plant growth.**

Photographs of two-months-old transgenic *N. benthamiana* plants grown on 0.5 MS + 1% sucrose. Scale bars, 1 cm.

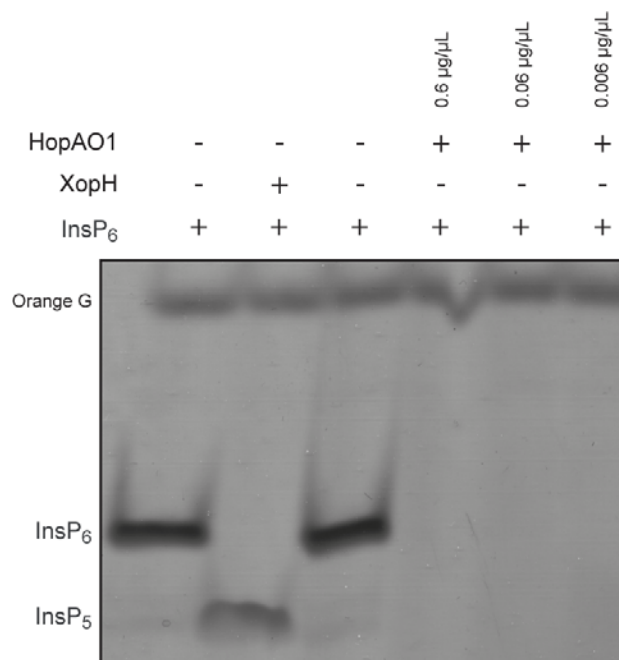

**Supplementary Figure 11: HopAO1 from *Pseudomonas syringae* pv. *tomato* hydrolyzes InsP<sub>6</sub> into lower phosphorylated *myo*-inositol derivatives.**

Recombinant XopH (0.13  $\mu\text{g}/\mu\text{L}$ ) or indicated amounts of recombinant HopAO1 were incubated with 10 nmol InsP<sub>6</sub> in reaction buffer (10 mM NaCl, 5% glycerol, 5 mM  $\beta$ -mercaptoethanol and 50 mM HEPES, pH 7.0) at 28°C for 30 min. Reaction products were separated by PAGE and visualized by toluidine blue staining. Orange G, loading dye. The experiment was repeated once with similar results.

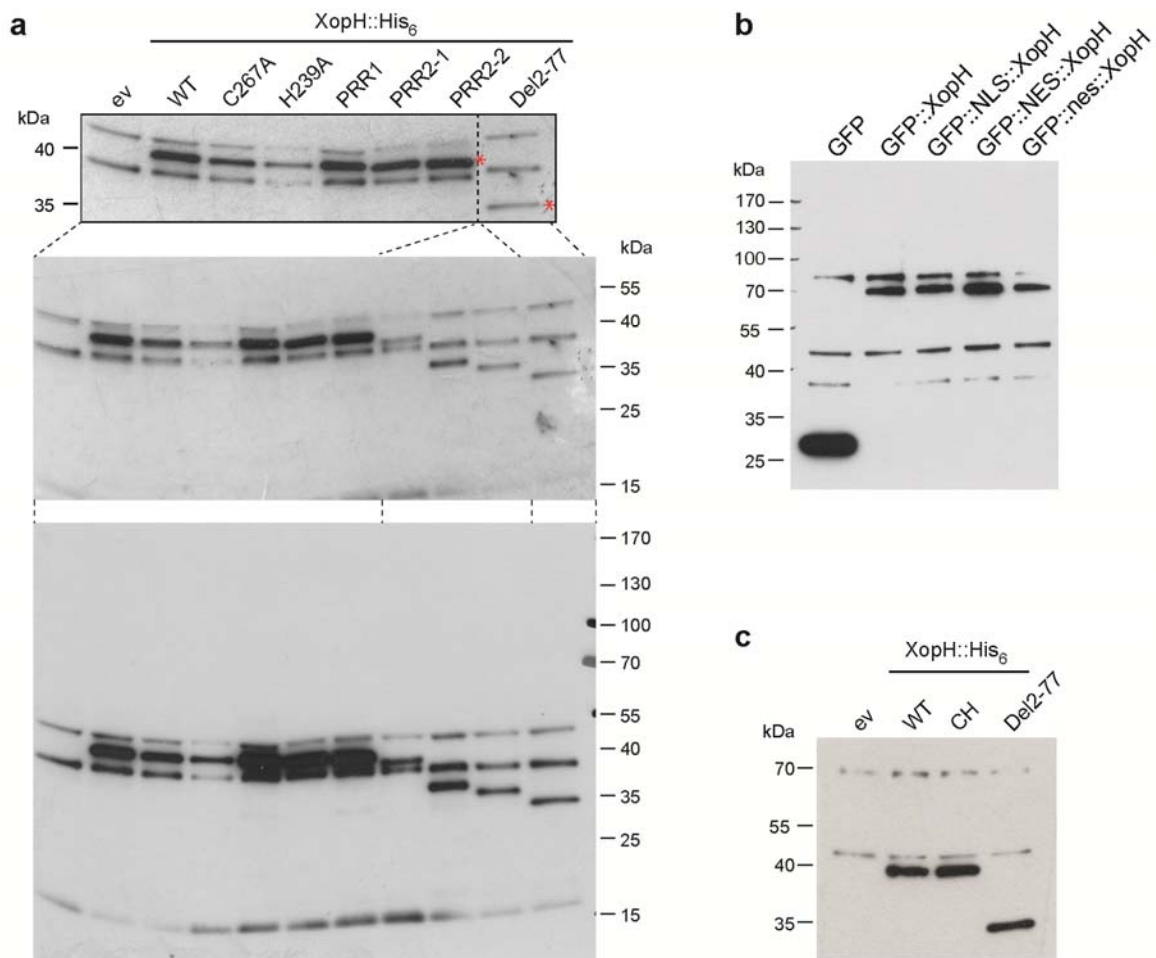

**Supplementary Figure 12: Unprocessed Western blots.**

**a**, Reproduction of Fig. 1e (*top*) and the full blot of the membrane including a longer exposure (*bottom*). Please note that we removed three lanes that were not relevant for the results presented (stippled lines). **b**, **c**, Full Western blots used in Fig. 3c (b) and Fig. 8b (c).



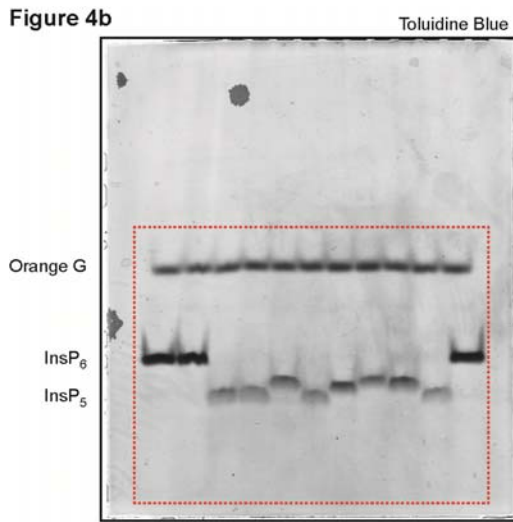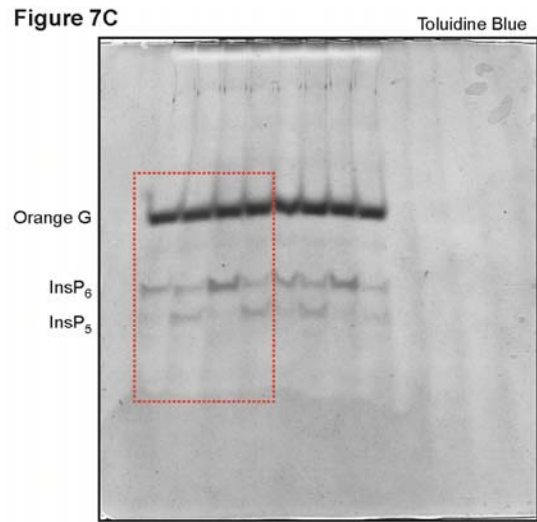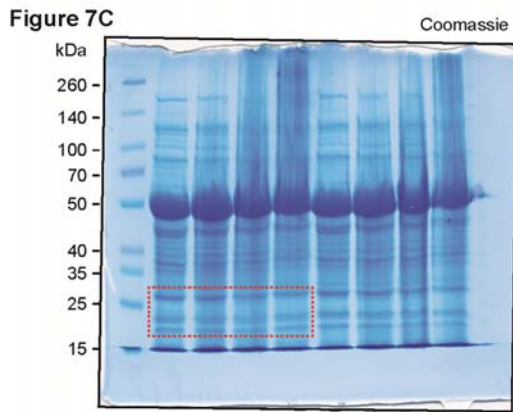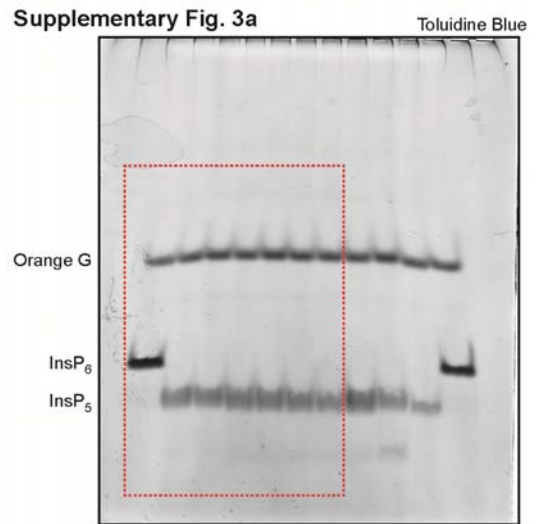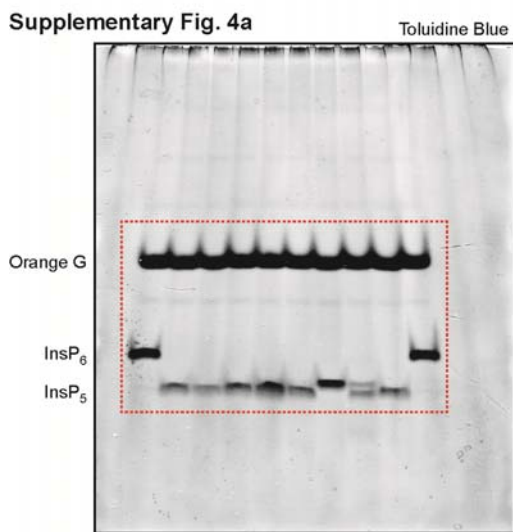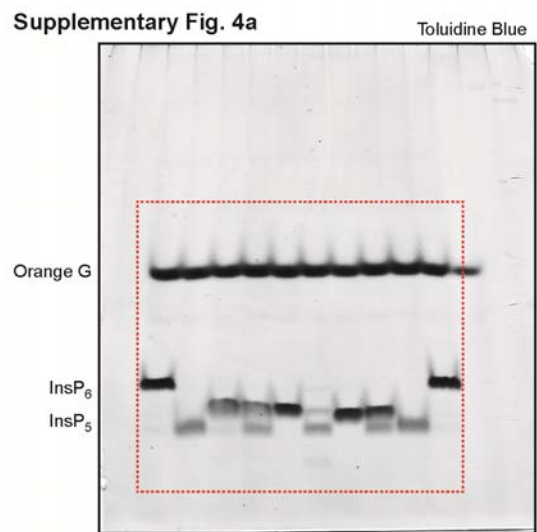

**Supplementary Figure 13: Uncropped gels.**

Supplementary Fig. 4b

Toluidine Blue

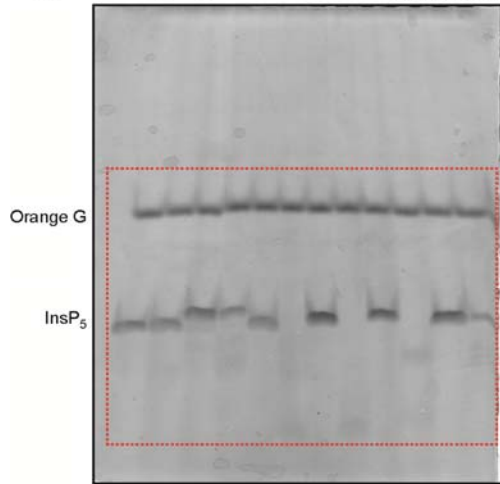

Supplementary Fig. 4c

Toluidine Blue

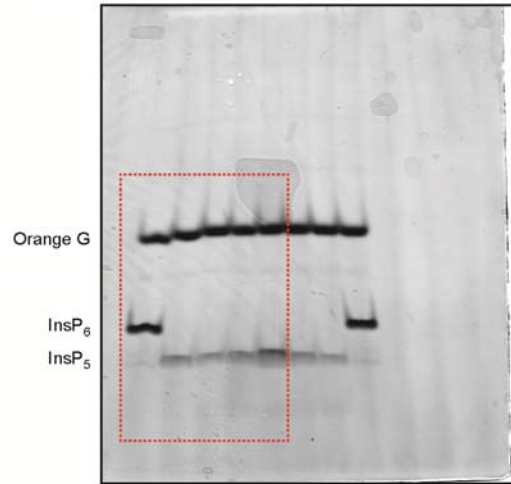

Supplementary Fig. 9

Toluidine Blue

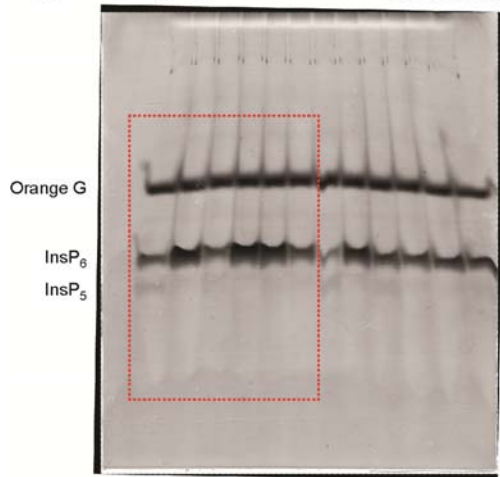

Supplementary Fig. 9

Coomassie

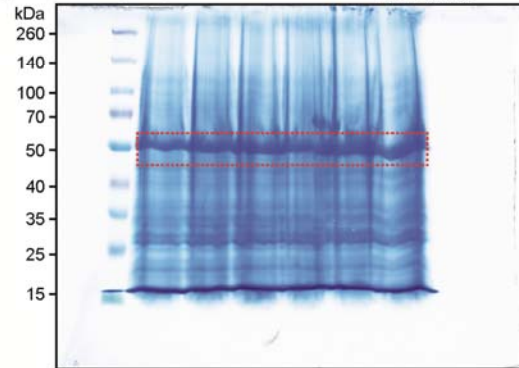

Supplementary Fig. 11

Toluidine Blue

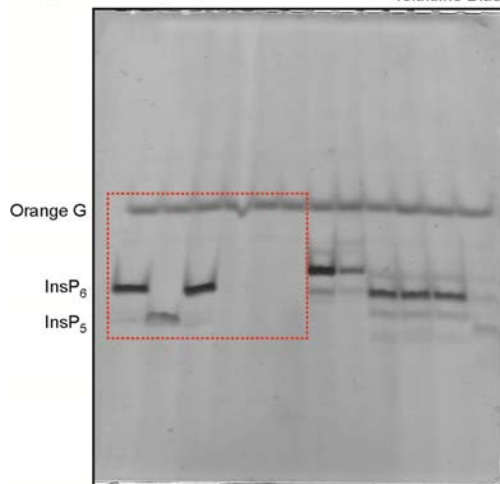

Supplementary Figure 13: Uncropped gels (continued).

## Supplementary Table 1

### Oligonucleotides used in this study.

| Name                     | Sequence (5'-3')                                                 | Purpose                                                                              |
|--------------------------|------------------------------------------------------------------|--------------------------------------------------------------------------------------|
| XopH-GW-fw               | CACCATGCCGAACAAAATCTCCGGCTCAA                                    | GATEWAY cloning of <i>xopH-his<sub>6</sub></i>                                       |
| XopH-del2-77 GW-fw       | CACCATGTCACATCCTGTTCTAGCTTACGACAG                                | GATEWAY cloning of <i>xopH-del2-77-his<sub>6</sub></i>                               |
| XopH-C267A               | TGCATGTACATGCTGGTATGGGCCT <sup>a</sup>                           | Site-directed mutagenesis (XopH-C267A)                                               |
| XopH-262rev              | GTCTCTCATCATGGGCCATCTCC <sup>a</sup>                             |                                                                                      |
| XopH-H239A-fw            | GTTTGACAGTGACAGATGCTCTTTCACCACGG<br>GCGGACGATATTG                | Site-directed mutagenesis (XopH-H239A and -CH)                                       |
| XopH-H239A-rv            | CAATATCGTCCGCCGTGGTGAAAGAGCATCT<br>GTCACTGTCAAAC                 |                                                                                      |
| XopH-mutP43-52-53-fw     | TCCCGCAGAACTCGCCGATCTAGCAAGCCGGC<br>AAGCAGCTCGGTCAAAAACAGCACTTTA | Site-directed mutagenesis (PRR1 mutant)                                              |
| XopH-mutP43-52-53-rv     | TAAAGTGCTGTTTTTGACCGAGCTGCTTGCCGG<br>CTTGCTAGATCGGCGAGTTCTGCGGGA |                                                                                      |
| XopH-mutP69-71-fw        | TAATCCAGAAATTCAGAGACGCTTTGGCTCTC<br>CCGCCACCACCCACGTCACATCCT     | Site-directed mutagenesis (PRR2-1 mutant)                                            |
| XopH-mutP69-71-rv        | AGGATGTGACGTGGGTGGTGGCGGGAGAGCC<br>AAAGCGTCTCTGAATTTCTGGATTA     |                                                                                      |
| XopH-mutP73-74-75-76-fw  | AGAAATTCAGAGACCCTTTCCTCTCGCGGCA<br>GCAGCCACGTCACATCCTGTTCTAGCTT  | Site-directed mutagenesis (PRR2-2 mutant)                                            |
| XopH-mutP73-74-75-76-rv  | AAGCTAGAACAGGATGTGACGTGGCTGCTGCC<br>GCGAGAGGCAAAGGTCTCTGAATTTCT  | Site-directed mutagenesis (PRR2-2 mutant)                                            |
| caac-EGFP fw             | CACCATGGTGAGCAAGGGCGAGGAGCT                                      | SOE-PCR for <i>gfp-xopH</i> derivatives                                              |
| NLS-XopH rv              | TCCCGAGCCTCCAAAAAAGAAGAGAAAGGTC<br>ATGCCGAACAAAATCTCCGGCTCAA     | SOE-PCR for <i>gfp-NLS-xopH-his<sub>6</sub></i>                                      |
| NLS-XopH-fw              | TTGAGCCGAGATTTTGTTCGGCATGACCTTTC<br>TCTTCTTTTTTGAGGCTCGGGA       |                                                                                      |
| NES-XopH-rv              | TTGAGCCGAGATTTTGTTCGGCATCTTGTTAA<br>TATCAAGTCCAGCCAACTTAAGAGCA   | SOE-PCR for <i>gfp-NES-xopH-his<sub>6</sub></i>                                      |
| NES-XopH-fw              | TGCTCTTAAGTTGGCTGGACTTGATATTAACAA<br>GATGCCGAACAAAATCTCCGGCTCAA  |                                                                                      |
| nes-XopH-rv              | TTGAGCCGAGATTTTGTTCGGCATCTTGTTAG<br>CATCTGCTCCAGCTGCCTTAAGAGCA   | SOE-PCR for <i>gfp-nes-xopH-his<sub>6</sub></i>                                      |
| nes-XopH-fw              | TGCTCTTAAGGCAGCTGGAGCAGATGCTAACA<br>AGATGCCGAACAAAATCTCCGGCTCAA  |                                                                                      |
| XopH-His6 GW-rv          | TTAGTGATGGTGATGGTGATGTGCATTGTGGTC<br>GAGCCATTCGGAC               | GATEWAY cloning of <i>xopH-his<sub>6</sub></i> , SOE-PCR <i>gfp-xopH</i> derivatives |
| eGFP-GW-rv               | CTTGTACAGCTCGTCCATGCCGAGAGTGATCC<br>CGGCGGCGGTAC                 | GATEWAY cloning of <i>gfp</i>                                                        |
| eGFP-GW-fw               | CACCATGGTGAGCAAGGGCGAGGAGCTGTTCA<br>CCGGGGTGGTGCCCATC            |                                                                                      |
| pET-XopH-NdeI-fw         | AAGGAGATATACATATGCCGAACAAAATCTCC<br>GGC                          | In-Fusion HD cloning of <i>xopH-his<sub>6</sub></i> into pET22b(+)                   |
| pET-XopH-del2-77-NdeI-fw | AAGGAGATATACATATGTCACATCCTGTTCTA<br>GCTTACGAC                    | In-Fusion HD cloning of <i>xopH-del2-77-his<sub>6</sub></i> into pET22b(+)           |
| pET-XopH-XhoI-rv         | GGTGGTGGTGGCTCGAGTGCATTGTGGTCGAGC<br>CATTCCG                     | In-Fusion HD cloning into pET22b(+)                                                  |
| pUC57-BamHI-early-       | TCTAGATATCGGATCCTACGCCAGCGTCGCTCT                                | pOK-early-stop- <i>xopH</i>                                                          |

|                           |                                           |                                     |
|---------------------------|-------------------------------------------|-------------------------------------|
| stop-fw                   |                                           | (fragment I)                        |
| xopH-early-stop-A-rv      | CTTCCCGGATCGCGTCTGCT                      |                                     |
| xopH-early-stop-B-fw      | ACGCGATCCGGGAAGAGTGCCGACT                 | pOK-early-stop- <i>xopH</i>         |
| pUC57-BamHI-early-stop-rv | GACGGGCCCGGGATCCACGTACATATTTGGCG<br>CCCG  | (fragment II)                       |
| si CaCOI1 fwd             | CACCAGATCTGCCACTTGATAATGGTGT <sup>b</sup> | COI1 silencing construct            |
| si NbCOI1 rev             | TCCAGAAGGCCTTCATCGGAT                     |                                     |
| si CaEIN2 fwd             | CACCAACGGGTACTTTCTGCTTC <sup>b</sup>      | EIN2 silencing construct            |
| si CaEIN2 rev             | CCAATACATAAGAATTCGCAC                     |                                     |
| si CaEBF1 fwd             | CACCAATAAGTGCTTGCAGTGGAG <sup>b</sup>     | EBF1 silencing construct            |
| si CaEBF1 rev             | GCAGTTCACCAGGAAAGAG <sup>b</sup>          |                                     |
| NbMYC2 fwd                | GATGGGATGCTATGATTTCGTATAC <sup>c</sup>    | qRT-PCR                             |
| NbMYC2 rev                | CTGAAACACTAGCATGGTGCACATC <sup>c</sup>    |                                     |
| NbPI-II fwd               | GGGGAGCCTCAAAGTGCTGC <sup>c</sup>         | qRT-PCR                             |
| NbPI-II rev               | CAGAGTTAGCATGACAGTGC <sup>c</sup>         |                                     |
| NbPR1 fwd                 | CGTTACGGCGAAAACCTAGC                      | qRT-PCR                             |
| NbPR1 rev                 | CCCGGTGCACAAGTATTCGA                      |                                     |
| NbPR4 fwd                 | GGCCAAGATTCTGTGGTAGAT <sup>d</sup>        | qRT-PCR                             |
| NbPR4 rev                 | CACTGTTGTTTGAGTTCCTGTTCT <sup>d</sup>     |                                     |
| NbLR23 fwd                | AGGATGCCGTCAAGAAGATGT                     | qRT-PCR                             |
| NbLR23 rev                | TCTGGTGTCAATCGAACAAACG                    |                                     |
| NbF-Box fwd               | CCTCCCAGGTATTTTCGTGCA                     | qRT-PCR                             |
| NbF-Box rev               | CCTTTCCTTGGTTCAGGA                        |                                     |
| NbCOI1 fwd                | ATGCACTTCTTGACACAGCAG                     | qRT-PCR                             |
| NbCOI1 rev                | CCCCAACAAACATTCTTGTC                      |                                     |
| NbEIN2 fwd                | CCGTCTGTTGGTCGATCAAC                      | qRT-PCR                             |
| NbEIN2 rev                | GGCGAATGTTCAAACCTCTG                      |                                     |
| NbEBF1 fwd                | ATGTCTAAAGTCTTCAATTTTAGTG                 | qRT-PCR                             |
| NbEBF1 rev                | CAAGGGAGAGAAATAGGCTG                      |                                     |
| XopH ATG fw               | ATGCCGAACAAAATCTCCGG                      | Analysis of <i>xopH</i> -transgenic |
| XopH rv-3                 | GTCACGTGATTTGCCAGCAT                      | <i>N. benthamiana</i>               |

<sup>a</sup> 5' phosphorylation; <sup>b</sup> 1-bp exchange in *N. benthamiana*; <sup>c</sup> adapted for *N. benthamiana* from references 2 and 3.

## Supplementary References

- 1 Stevenson-Paulik, J., Bastidas, R. J., Chiou, S.-T., Frye, R. A. & York, J. D. Generation of phytate-free seeds in *Arabidopsis* through disruption of inositol polyphosphate kinases. *Proc. Natl. Acad. Sci. USA* **102**, 12612-12617 (2005).
- 2 Shoji, T. & Hashimoto, T. Tobacco MYC2 regulates jasmonate-inducible nicotine biosynthesis genes directly and by way of the *NIC2*-locus *ERF* genes. *Plant Cell Physiol.* **52**, 1117-1130, doi:10.1093/pcp/pcr063 (2011).
- 3 Kiba, A. *et al.* SEC14 phospholipid transfer protein is involved in lipid signaling-mediated plant immune responses in *Nicotiana benthamiana*. *PLoS ONE* **9**, e98150, doi:10.1371/journal.pone.0098150 (2014).
